# Supplementary material
Source: publisher figshare collection journal article supplement (https://acs.figshare.com/ndownloader/files/3968998)
Supplement: Supplementary file 1 [file 3968998]

 
data_3
 
_audit_creation_method            SHELXL-97 
_chemical_name_systematic 
; 
 ? 
; 
_chemical_name_common             ? 
_chemical_melting_point           ? 
_chemical_formula_moiety          'C16H12N2O3'  
_chemical_formula_sum 
 'C16H12N2O3' 
_chemical_formula_weight          280.28
 
loop_ 
 _atom_type_symbol 
 _atom_type_description 
 _atom_type_scat_dispersion_real 
 _atom_type_scat_dispersion_imag 
 _atom_type_scat_source 
 'C'  'C'   0.0033   0.0016 
 'International Tables Vol C Tables 4.2.6.8 and 6.1.1.4' 
 'H'  'H'   0.0000   0.0000 
 'International Tables Vol C Tables 4.2.6.8 and 6.1.1.4' 
 'N'  'N'   0.0061   0.0033 
 'International Tables Vol C Tables 4.2.6.8 and 6.1.1.4' 
 'O'  'O'   0.0106   0.0060 
 'International Tables Vol C Tables 4.2.6.8 and 6.1.1.4' 
 
_symmetry_cell_setting            'monoclinic' 
_symmetry_space_group_name_H-M    'P 21/n'
 
loop_ 
 _symmetry_equiv_pos_as_xyz 
 'x, y, z' 
 '-x+1/2, y+1/2, -z+1/2' 
 '-x, -y, -z' 
 'x-1/2, -y-1/2, z-1/2' 
 
_cell_length_a                    5.8881(7) 
_cell_length_b                    13.3081(17) 
_cell_length_c                    16.604(2) 
_cell_angle_alpha                 90.00 
_cell_angle_beta                  95.657(11) 
_cell_angle_gamma                 90.00 
_cell_volume                      1294.7(3) 
_cell_formula_units_Z             4 
_cell_measurement_temperature     298
_cell_measurement_reflns_used     ? 
_cell_measurement_theta_min       ? 
_cell_measurement_theta_max       ? 
 
_exptl_crystal_description        needle 
_exptl_crystal_colour             orange 
_exptl_crystal_size_max           ? 
_exptl_crystal_size_mid           ? 
_exptl_crystal_size_min           ? 
_exptl_crystal_density_meas       ? 
_exptl_crystal_density_diffrn     1.324 
_exptl_crystal_density_method     'not measured' 
_exptl_crystal_F_000              528 
_exptl_absorpt_coefficient_mu     0.119 
_exptl_absorpt_correction_type    multi-scan 
_exptl_absorpt_correction_T_min   ? 
_exptl_absorpt_correction_T_max   ? 
_exptl_absorpt_process_details    ? 
 
_exptl_special_details 
; 
 ? 
; 
 
_diffrn_ambient_temperature       298
_diffrn_radiation_wavelength      0.71073 
_diffrn_radiation_type            MoK\a 
_diffrn_radiation_source          'fine-focus sealed tube' 
_diffrn_radiation_monochromator   graphite 
_diffrn_measurement_device_type   ? 
_diffrn_measurement_method        ? 
_diffrn_detector_area_resol_mean  ? 
_diffrn_standards_number          ? 
_diffrn_standards_interval_count  ? 
_diffrn_standards_interval_time   ? 
_diffrn_standards_decay_%         ? 
_diffrn_reflns_number             5179 
_diffrn_reflns_av_R_equivalents   0.0249 
_diffrn_reflns_av_sigmaI/netI     0.0369 
_diffrn_reflns_limit_h_min        -7 
_diffrn_reflns_limit_h_max        7 
_diffrn_reflns_limit_k_min        -9 
_diffrn_reflns_limit_k_max        16 
_diffrn_reflns_limit_l_min        -14 
_diffrn_reflns_limit_l_max        20 
_diffrn_reflns_theta_min          2.90 
_diffrn_reflns_theta_max          26.37 
_reflns_number_total              2652 
_reflns_number_gt                 2001 
_reflns_threshold_expression      >2sigma(I) 
 
_computing_data_collection        ? 
_computing_cell_refinement        ? 
_computing_data_reduction         ? 
_computing_structure_solution     'SHELXS-97 (Sheldrick, 1990)' 
_computing_structure_refinement   'SHELXL-97 (Sheldrick, 1997)' 
_computing_molecular_graphics     ? 
_computing_publication_material   ? 
 
_refine_special_details 
; 
 Refinement of F^2^ against ALL reflections.  The weighted R-factor wR and 
 goodness of fit S are based on F^2^, conventional R-factors R are based 
 on F, with F set to zero for negative F^2^. The threshold expression of 
 F^2^ > 2sigma(F^2^) is used only for calculating R-factors(gt) etc. and is 
 not relevant to the choice of reflections for refinement.  R-factors based 
 on F^2^ are statistically about twice as large as those based on F, and R- 
 factors based on ALL data will be even larger. 
; 
 
_refine_ls_structure_factor_coef  Fsqd  
_refine_ls_matrix_type            full 
_refine_ls_weighting_scheme       calc  
_refine_ls_weighting_details 
 'calc w=1/[\s^2^(Fo^2^)+(0.1000P)^2^+0.0000P] where P=(Fo^2^+2Fc^2^)/3' 
_atom_sites_solution_primary      direct 
_atom_sites_solution_secondary    difmap 
_atom_sites_solution_hydrogens    geom 
_refine_ls_hydrogen_treatment     mixed 
_refine_ls_extinction_method      none 
_refine_ls_extinction_coef        ? 
_refine_ls_number_reflns          2652 
_refine_ls_number_parameters      191 
_refine_ls_number_restraints      0 
_refine_ls_R_factor_all           0.0611 
_refine_ls_R_factor_gt            0.0440 
_refine_ls_wR_factor_ref          0.1479 
_refine_ls_wR_factor_gt           0.1300 
_refine_ls_goodness_of_fit_ref    0.938 
_refine_ls_restrained_S_all       0.938 
_refine_ls_shift/su_max           0.013 
_refine_ls_shift/su_mean          0.002 
 
loop_ 
 _atom_site_label 
 _atom_site_type_symbol 
 _atom_site_fract_x 
 _atom_site_fract_y 
 _atom_site_fract_z 
 _atom_site_U_iso_or_equiv 
 _atom_site_adp_type 
 _atom_site_occupancy 
 _atom_site_symmetry_multiplicity 
 _atom_site_calc_flag 
 _atom_site_refinement_flags 
 _atom_site_disorder_assembly 
 _atom_site_disorder_group 
O2 O 0.26836(19) 0.32753(10) 0.59670(7) 0.0490(4) Uani 1 1 d . . . 
N1 N 0.5308(2) 0.20071(11) 0.68637(8) 0.0395(4) Uani 1 1 d . . . 
H1 H 0.4191 0.2257 0.7094 0.047 Uiso 1 1 calc R . . 
N2 N 0.7499(2) 0.21391(11) 0.29984(8) 0.0455(4) Uani 1 1 d . . . 
O3 O 1.0786(2) 0.13630(12) 0.52004(8) 0.0622(4) Uani 1 1 d . . . 
O1 O 0.5105(3) 0.33642(11) 0.50272(9) 0.0717(5) Uani 1 1 d . . . 
C7 C 0.7672(3) 0.16620(12) 0.59264(9) 0.0360(4) Uani 1 1 d . . . 
C12 C 0.7432(3) 0.16393(12) 0.43768(10) 0.0360(4) Uani 1 1 d . . . 
C1 C 0.8433(3) 0.11342(12) 0.66507(10) 0.0358(4) Uani 1 1 d . . . 
C8 C 0.5779(3) 0.22062(12) 0.60939(9) 0.0367(4) Uani 1 1 d . . . 
C16 C 0.5270(3) 0.12656(13) 0.42115(11) 0.0426(4) Uani 1 1 d . . . 
H16 H 0.4502 0.0981 0.4618 0.051 Uiso 1 1 calc R . . 
C3 C 1.0497(3) 0.01395(16) 0.76511(12) 0.0533(5) Uani 1 1 d . . . 
H3 H 1.1740 -0.0268 0.7816 0.064 Uiso 1 1 calc R . . 
C13 C 0.8472(3) 0.20557(13) 0.37463(10) 0.0416(4) Uani 1 1 d . . . 
H13 H 0.9956 0.2293 0.3855 0.050 Uiso 1 1 calc R . . 
C6 C 0.6879(3) 0.13529(12) 0.72095(10) 0.0366(4) Uani 1 1 d . . . 
C11 C 0.8770(3) 0.15624(13) 0.51774(11) 0.0407(4) Uani 1 1 d . . . 
C14 C 0.5410(3) 0.17641(14) 0.28528(11) 0.0469(5) Uani 1 1 d . . . 
H14 H 0.4693 0.1806 0.2329 0.056 Uiso 1 1 calc R . . 
C9 C 0.4522(3) 0.29899(13) 0.56257(10) 0.0419(4) Uani 1 1 d . . . 
C2 C 1.0278(3) 0.05115(14) 0.68828(11) 0.0439(4) Uani 1 1 d . . . 
H2 H 1.1336 0.0353 0.6522 0.053 Uiso 1 1 calc R . . 
C15 C 0.4264(3) 0.13204(14) 0.34314(11) 0.0471(5) Uani 1 1 d . . . 
H15 H 0.2812 0.1057 0.3299 0.056 Uiso 1 1 calc R . . 
C5 C 0.7079(3) 0.09523(14) 0.79846(11) 0.0481(5) Uani 1 1 d . . . 
H5 H 0.6005 0.1088 0.8345 0.058 Uiso 1 1 calc R . . 
C4 C 0.8909(4) 0.03539(15) 0.81947(11) 0.0561(5) Uani 1 1 d . . . 
H4 H 0.9105 0.0081 0.8713 0.067 Uiso 1 1 calc R . . 
C10 C 0.1291(4) 0.40218(17) 0.55438(13) 0.0649(6) Uani 1 1 d . . . 
H10A H 0.0628 0.3751 0.5039 0.097 Uiso 1 1 calc R . . 
H10B H 0.2209 0.4596 0.5443 0.097 Uiso 1 1 calc R . . 
H10C H 0.0100 0.4220 0.5866 0.097 Uiso 1 1 calc R . . 
 
loop_ 
 _atom_site_aniso_label 
 _atom_site_aniso_U_11 
 _atom_site_aniso_U_22 
 _atom_site_aniso_U_33 
 _atom_site_aniso_U_23 
 _atom_site_aniso_U_13 
 _atom_site_aniso_U_12 
O2 0.0488(7) 0.0548(8) 0.0435(7) 0.0026(6) 0.0041(6) 0.0173(6) 
N1 0.0431(7) 0.0448(8) 0.0323(7) -0.0003(6) 0.0126(6) 0.0100(6) 
N2 0.0531(9) 0.0478(9) 0.0378(8) 0.0012(7) 0.0159(7) -0.0021(7) 
O3 0.0379(7) 0.1002(12) 0.0504(9) -0.0047(8) 0.0137(6) 0.0040(7) 
O1 0.1047(12) 0.0656(10) 0.0494(8) 0.0203(8) 0.0302(8) 0.0288(9) 
C7 0.0375(8) 0.0392(9) 0.0323(8) -0.0022(7) 0.0093(7) -0.0012(7) 
C12 0.0364(8) 0.0389(9) 0.0347(9) -0.0040(7) 0.0145(7) -0.0005(7) 
C1 0.0385(8) 0.0352(8) 0.0346(9) -0.0060(7) 0.0073(7) -0.0026(7) 
C8 0.0440(9) 0.0387(9) 0.0284(8) -0.0008(7) 0.0081(7) 0.0016(7) 
C16 0.0424(9) 0.0468(10) 0.0411(10) -0.0001(8) 0.0162(7) -0.0062(8) 
C3 0.0556(11) 0.0511(11) 0.0517(11) -0.0027(9) -0.0028(9) 0.0156(9) 
C13 0.0432(9) 0.0445(10) 0.0397(9) -0.0031(8) 0.0162(7) -0.0056(7) 
C6 0.0434(8) 0.0347(9) 0.0320(8) -0.0016(7) 0.0056(7) 0.0046(7) 
C11 0.0381(8) 0.0445(10) 0.0413(10) -0.0046(8) 0.0128(7) -0.0043(7) 
C14 0.0507(10) 0.0507(11) 0.0400(10) -0.0016(8) 0.0077(8) 0.0058(8) 
C9 0.0533(10) 0.0416(9) 0.0313(9) -0.0033(8) 0.0063(7) 0.0076(8) 
C2 0.0422(9) 0.0432(10) 0.0462(10) -0.0079(8) 0.0044(8) 0.0063(8) 
C15 0.0389(9) 0.0520(11) 0.0508(11) -0.0060(9) 0.0072(8) -0.0038(8) 
C5 0.0642(11) 0.0477(10) 0.0340(9) 0.0010(8) 0.0123(8) 0.0090(9) 
C4 0.0778(13) 0.0530(12) 0.0364(10) 0.0057(9) 0.0006(9) 0.0173(10) 
C10 0.0637(12) 0.0667(14) 0.0607(13) -0.0042(11) -0.0116(10) 0.0259(10) 
 
_geom_special_details 
; 
 All esds (except the esd in the dihedral angle between two l.s. planes) 
 are estimated using the full covariance matrix.  The cell esds are taken 
 into account individually in the estimation of esds in distances, angles 
 and torsion angles; correlations between esds in cell parameters are only 
 used when they are defined by crystal symmetry.  An approximate (isotropic) 
 treatment of cell esds is used for estimating esds involving l.s. planes. 
; 
 
loop_ 
 _geom_bond_atom_site_label_1 
 _geom_bond_atom_site_label_2 
 _geom_bond_distance 
 _geom_bond_site_symmetry_2 
 _geom_bond_publ_flag 
O2 C9 1.326(2) . ? 
O2 C10 1.428(2) . ? 
N1 C6 1.356(2) . ? 
N1 C8 1.360(2) . ? 
N2 C13 1.320(2) . ? 
N2 C14 1.327(2) . ? 
O3 C11 1.213(2) . ? 
O1 C9 1.192(2) . ? 
C7 C8 1.380(2) . ? 
C7 C1 1.426(2) . ? 
C7 C11 1.463(2) . ? 
C12 C16 1.369(2) . ? 
C12 C13 1.380(2) . ? 
C12 C11 1.480(2) . ? 
C1 C2 1.390(2) . ? 
C1 C6 1.396(2) . ? 
C8 C9 1.458(2) . ? 
C16 C15 1.372(2) . ? 
C3 C2 1.362(3) . ? 
C3 C4 1.392(3) . ? 
C6 C5 1.387(2) . ? 
C14 C15 1.362(2) . ? 
C5 C4 1.357(2) . ? 
 
loop_ 
 _geom_angle_atom_site_label_1 
 _geom_angle_atom_site_label_2 
 _geom_angle_atom_site_label_3 
 _geom_angle 
 _geom_angle_site_symmetry_1 
 _geom_angle_site_symmetry_3 
 _geom_angle_publ_flag 
C9 O2 C10 116.26(15) . . ? 
C6 N1 C8 109.22(13) . . ? 
C13 N2 C14 116.63(14) . . ? 
C8 C7 C1 106.34(13) . . ? 
C8 C7 C11 130.70(15) . . ? 
C1 C7 C11 122.92(14) . . ? 
C16 C12 C13 117.84(16) . . ? 
C16 C12 C11 123.85(15) . . ? 
C13 C12 C11 118.18(14) . . ? 
C2 C1 C6 119.03(15) . . ? 
C2 C1 C7 134.38(15) . . ? 
C6 C1 C7 106.59(14) . . ? 
N1 C8 C7 109.30(14) . . ? 
N1 C8 C9 120.03(14) . . ? 
C7 C8 C9 130.19(15) . . ? 
C12 C16 C15 118.46(15) . . ? 
C2 C3 C4 121.66(17) . . ? 
N2 C13 C12 124.31(15) . . ? 
N1 C6 C5 129.16(15) . . ? 
N1 C6 C1 108.47(14) . . ? 
C5 C6 C1 122.34(15) . . ? 
O3 C11 C7 120.41(16) . . ? 
O3 C11 C12 118.41(15) . . ? 
C7 C11 C12 121.07(14) . . ? 
N2 C14 C15 123.31(17) . . ? 
O1 C9 O2 123.44(17) . . ? 
O1 C9 C8 124.78(17) . . ? 
O2 C9 C8 111.71(14) . . ? 
C3 C2 C1 118.40(16) . . ? 
C14 C15 C16 119.40(16) . . ? 
C4 C5 C6 117.16(17) . . ? 
C5 C4 C3 121.38(18) . . ? 
 
_diffrn_measured_fraction_theta_max    0.999 
_diffrn_reflns_theta_full              26.37 
_diffrn_measured_fraction_theta_full   0.999 
_refine_diff_density_max    0.178 
_refine_diff_density_min   -0.187 
_refine_diff_density_rms    0.043 
